# Supplementary material for: Electrochemical detection of two tumor markers based on functionalized polypyrrole microspheres as immunoprobes
Source: Royal Society of Chemistry journal article supplement (doi:10.1039/c6ra01773h), 2016-01-01
Supplement: c6ra01773h1.pdf [file c6ra01773h1.pdf]

## **Electrochemical detection of two tumor markers based on functionalized polypyrrole microspheres as immunoprobes**

Junqing Zhao, Zilin Guo, Jinjin Guo, Junchun Wang, Yuzhong Zhang \*

College of Chemistry and Materials Science, Anhui Key Laboratory of Chem-Biosensing, Anhui Normal University, Wuhu 241000, People's Republic of China

---

\* Corresponding author. Tel.: +86 553 3869303; Fax: +86 553 3869303

E-mail address: zhyz65@mail.ahnu.edu.cn (Y. Zhang).

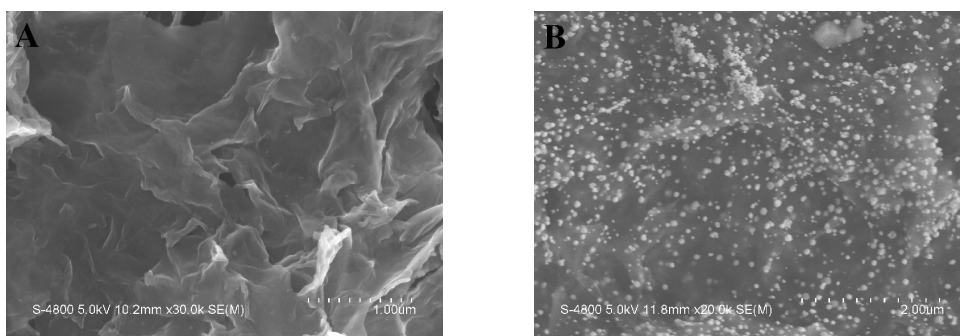

Fig. 1S SEM analysis of (A) rGO, (B) rGO/Au NPs nanocomposites

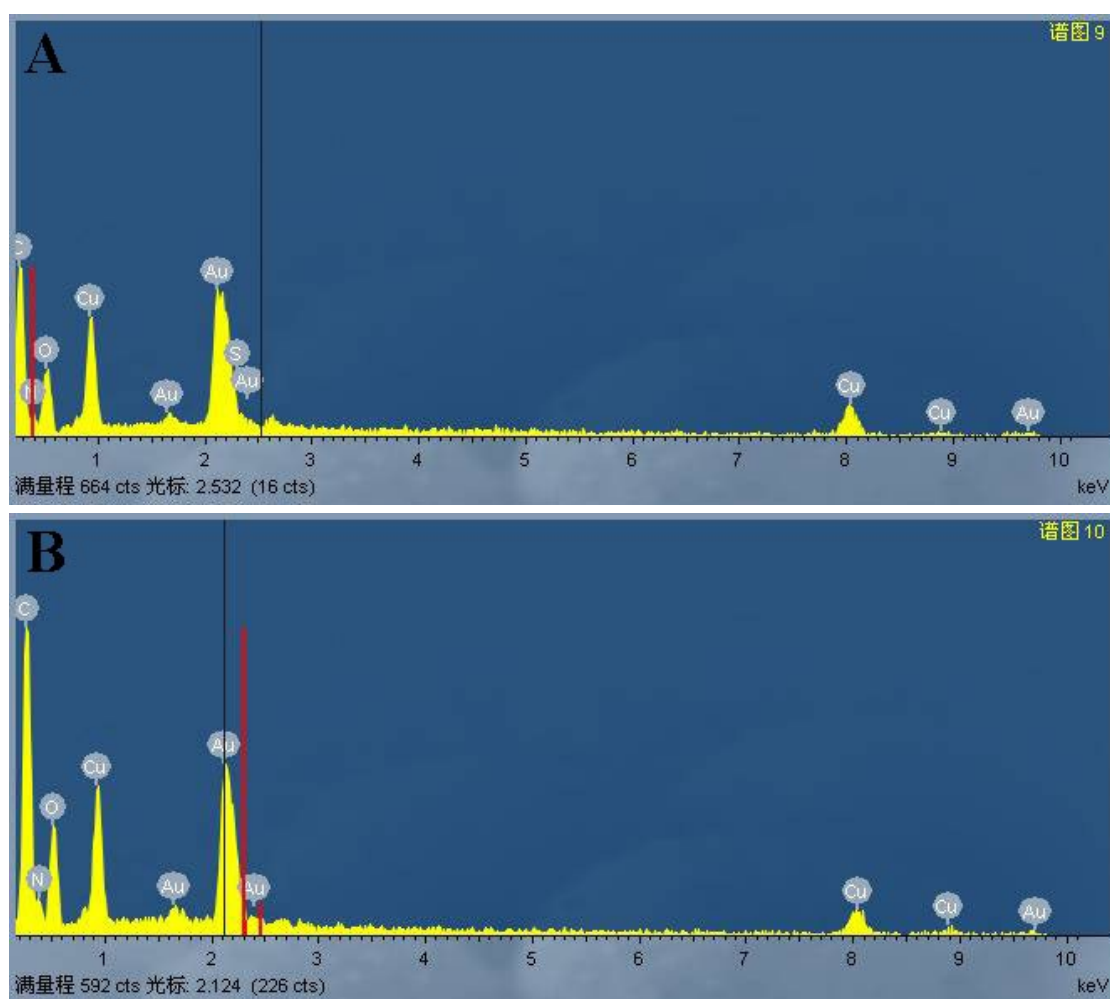

Fig. 2S EDS analysis (Cu as the basement) of (A) PPy@thionine@Au NPs, (B) PPy@adriamycin@Au NPs nanocomposites

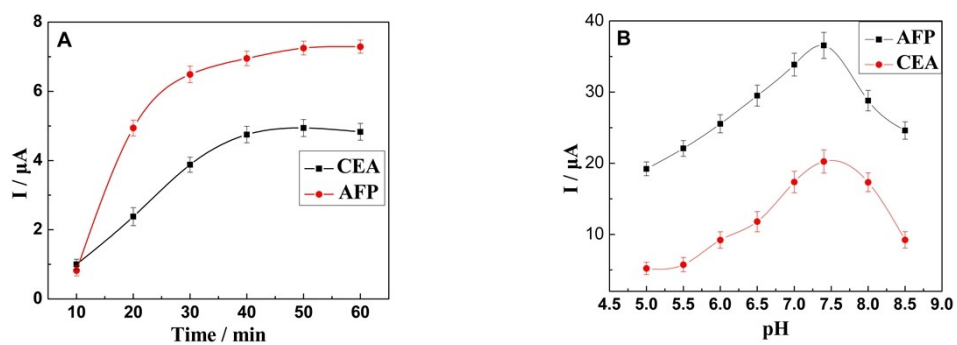

Fig. 3S Optimization of experimental conditions: (A) incubation time, (B) pH

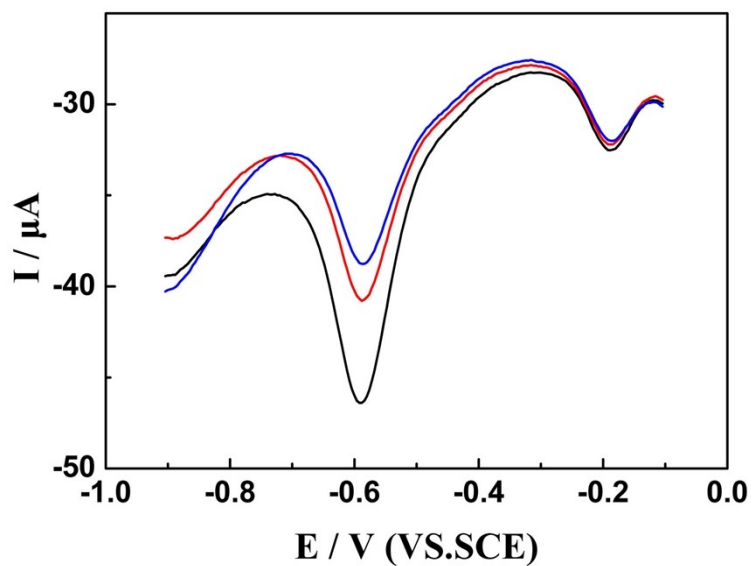

Fig. 4S The cross-reactivity investigation of immunosensor using DPV technology in the presence of  $0.01 \text{ ng mL}^{-1}$

CEA and various AFP concentrations ( $0.01 \text{ ng mL}^{-1}$ ,  $0.05 \text{ ng mL}^{-1}$ ,  $0.1 \text{ ng mL}^{-1}$ ).

**Table 1S** Comparison of several electrochemical immunosensors

|                                                                                    | Line arrange (ng mL <sup>-1</sup> ) |          | Detection limit (ng mL <sup>-1</sup> ) |         | References |
|------------------------------------------------------------------------------------|-------------------------------------|----------|----------------------------------------|---------|------------|
|                                                                                    | CEA                                 | AFP      | CEA                                    | AFP     |            |
| Magneto-controlled graphene immunosensing platform and distinguishable signal tags | 0.01-80                             | 0.01-200 | 0.001                                  | 0.001   | [24]       |
| A label-free immunosensor based on modified mesoporous silica                      | 0.5-45                              | 1-90     | 0.2                                    | 0.5     | [25]       |
| Immunoassay of biomarkers using chitosan nanocomposites                            | 0.05-100                            | 0.05-100 | 0.02                                   | 0.03    | [26]       |
| Immunoassay using HRP-functionalized Pt hollow nanospheres                         | 0.5-50                              | 0.3-45   | 0.05                                   | 0.08    | [27]       |
| Immunoassay using functionalized graphene nanocomposites                           | 0.6-80                              | 0.6-80   | 0.12                                   | 0.08    | [28]       |
| This work                                                                          | 0.001-50                            | 0.001-80 | 0.0004                                 | 0.00033 |            |

**Table 2S** The recovery experiment in serum samples

| Serum sample | added (ng/mL) |      | found (ng/mL) <sup>a</sup> |       | Recoveries (%) |      |
|--------------|---------------|------|----------------------------|-------|----------------|------|
|              | CEA           | AFP  | CEA                        | AFP   | CEA            | AFP  |
| 1            | 0.1           | 0.1  | 0.107                      | 0.098 | 107            | 98   |
| 2            | 1.00          | 1.00 | 0.995                      | 0.998 | 99.5           | 99.8 |
| 3            | 10.0          | 10.0 | 10.48                      | 9.87  | 104.8          | 98.7 |
| 4            | 40.0          | 40.0 | 40.25                      | 39.98 | 100.6          | 99.9 |
| 5            | 50.0          | 50.0 | 51.23                      | 49.16 | 102.5          | 96.3 |

a Mean value of five measurements
